# Supplementary material for: Multifold enhanced T2 relaxation of ZnFe2O4 nanoparticles by jamming them inside chitosan nanospheres
Source: Royal Society of Chemistry journal article supplement (doi:10.1039/c2jm15133b), 2012-01-01
Supplement: c2jm15133b.pdf [file c2jm15133b.pdf]

Supplementary Material (ESI) for Journal of Materials Chemistry  
This journal is (c) The Royal Society of Chemistry 2012

## **Supporting Information**

### **Multifold Enhanced $T_2$ Relaxation of $ZnFe_2O_4$ Nanoparticles by Jamming Them inside Chitosan Nanospheres**

Ying Lin, Wei Yao, Yuan Cheng, Hanqing Qian, Xin Wang, Yin Ding, Wei Wu,  
Xiqun Jiang\*

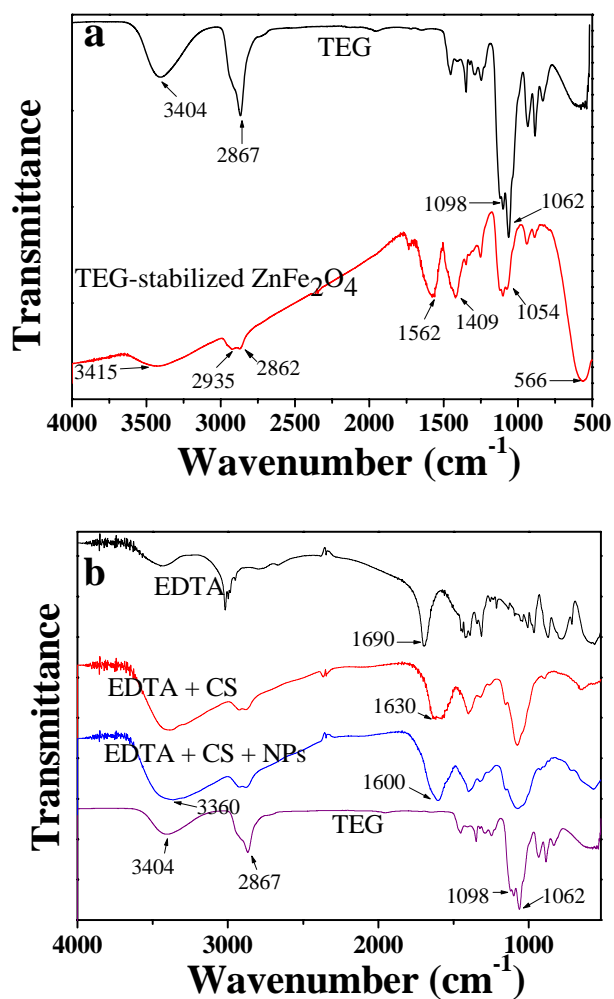

**Figure S1.** (a) FT-IR spectra of free TEG molecules and TEG-stabilized  $\text{ZnFe}_2\text{O}_4$  NPs. (b) FT-IR spectra of EDTA, TEG, the blend of CS and EDTA, the blend of CS-EDTA and  $\text{ZnFe}_2\text{O}_4$  NPs.

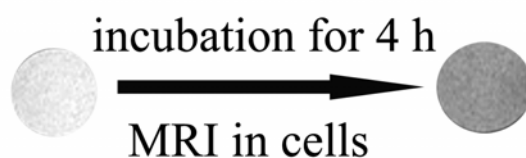

**Figure S2.** T2-weighted MR image of SH-SY5Y cells without treatment (left) and with treatment of CS- $\text{ZnFe}_2\text{O}_4$ -42 (right).
